# Supplementary material for: Assembly of a phospho-molybdic Wells–Dawson-based silver coordination polymer derived from Keggin polyoxoanion cluster
Source: Royal Society of Chemistry journal article supplement (doi:10.1039/c2dt30476g), 2012-01-01
Supplement: c2dt30476g.pdf [file c2dt30476g.pdf]

## <Supporting Information>

# Assembly of a Phospho-molybdic Wells-Dawson-based Silver Coordination Polymer Derived from Keggin Polyoxoanion Cluster

Dong-Bin Dang, Bing An, Yan Bai\* and Jing-Yang Niu\*

Institute of Molecular and Crystal Engineering, School of Chemistry and Chemical Engineering,  
Henan University, Kaifeng 475004, P. R. China

### Contents:

**Table S1.** Selected Bond Distances (Å) and Bond Angles (°) for **1**.

**Table S2.** Hydrogen Bonding Interactions (Å° and °) of **1**.

**Figure S1.** The 2D topologic structure with dumbbells diagram indicating  $[\text{P}_2\text{Mo}_{18}\text{O}_{62}]^{6-}$ .

**Figure S2.** View of 3D structure of **1**.

**Figure S3.** The 3D supramolecular framework of **1** showing  $\pi \cdots \pi$  interactions in dashed lines.

**Figure S4.** The 3D topologic structure of **1** showing  $\pi \cdots \pi$  interactions in dashed lines.

**Figure S5.** TGA curve for **1**.

**Figure S6.** The pattern calculated from the single-crystal data for polymer **1** (top) and the power X-ray diffraction pattern of the samples at 296 K (bottom).

**Figure S7.** The IR spectra of (a)–(e) represent the solid products obtained under different pH values in DMF/CH<sub>3</sub>OH solution system, 2.8, 3.4, 3.8, 1.8 and 2.2, respectively.

**Figure S8.** <sup>31</sup>P NMR spectra for H<sub>3</sub>PMo<sub>12</sub>O<sub>40</sub> alone in DMF solution at different pH values.

**Figure S9.** <sup>31</sup>P NMR spectra for H<sub>6</sub>P<sub>2</sub>Mo<sub>18</sub>O<sub>62</sub> alone in DMF solution at different pH values.

**Figure S10.** The IR spectra of (a)–(e) represent the solid products obtained under different pH values in H<sub>2</sub>O/CH<sub>3</sub>OH solution system, 1.8, 2.2, 2.8, 3.4 and 3.8, respectively.

**Table S1.** Selected Bond Distances (Å) and Bond Angles (°) for **1**.

|             |           |              |          |
|-------------|-----------|--------------|----------|
| P(1)–O(55)  | 1.532(8)  | Mo(11)–O(50) | 1.924(8) |
| P(1)–O(57)  | 1.536(8)  | Mo(11)–O(48) | 2.189(8) |
| P(1)–O(56)  | 1.543(9)  | Mo(11)–O(59) | 2.300(8) |
| P(1)–O(58)  | 1.575(8)  | Mo(12)–O(12) | 1.696(9) |
| P(2)–O(60)  | 1.530(8)  | Mo(12)–O(44) | 1.780(8) |
| P(2)–O(61)  | 1.531(8)  | Mo(12)–O(40) | 1.911(8) |
| P(2)–O(59)  | 1.548(9)  | Mo(12)–O(49) | 1.917(8) |
| P(2)–O(62)  | 1.566(8)  | Mo(12)–O(39) | 2.083(8) |
| Mo(1)–O(1)  | 1.692(10) | Mo(12)–O(60) | 2.336(8) |
| Mo(1)–O(19) | 1.800(8)  | Mo(13)–O(13) | 1.689(8) |
| Mo(1)–O(22) | 1.843(9)  | Mo(13)–O(38) | 1.759(8) |
| Mo(1)–O(20) | 2.064(9)  | Mo(13)–O(41) | 1.877(8) |
| Mo(1)–O(21) | 2.075(9)  | Mo(13)–O(40) | 1.954(8) |
| Mo(1)–O(58) | 2.380(9)  | Mo(13)–O(47) | 2.126(8) |
| Mo(2)–O(2)  | 1.704(9)  | Mo(13)–O(60) | 2.332(8) |
| Mo(2)–O(25) | 1.773(9)  | Mo(14)–O(14) | 1.691(9) |
| Mo(2)–O(23) | 1.846(9)  | Mo(14)–O(46) | 1.798(8) |
| Mo(2)–O(22) | 2.028(9)  | Mo(14)–O(42) | 1.890(8) |
| Mo(2)–O(24) | 2.068(9)  | Mo(14)–O(41) | 1.913(8) |
| Mo(2)–O(58) | 2.390(8)  | Mo(14)–O(37) | 2.091(8) |
| Mo(3)–O(3)  | 1.701(9)  | Mo(14)–O(61) | 2.356(8) |
| Mo(3)–O(26) | 1.800(9)  | Mo(15)–O(15) | 1.707(9) |
| Mo(3)–O(21) | 1.809(10) | Mo(15)–O(36) | 1.769(8) |
| Mo(3)–O(23) | 2.031(9)  | Mo(15)–O(43) | 1.879(8) |
| Mo(3)–O(27) | 2.052(9)  | Mo(15)–O(42) | 1.922(8) |
| Mo(3)–O(58) | 2.391(8)  | Mo(15)–O(53) | 2.163(8) |
| Mo(4)–O(4)  | 1.694(9)  | Mo(15)–O(61) | 2.359(8) |
| Mo(4)–O(20) | 1.777(9)  | Mo(16)–O(16) | 1.704(8) |
| Mo(4)–O(29) | 1.877(9)  | Mo(16)–O(48) | 1.752(8) |
| Mo(4)–O(28) | 1.910(9)  | Mo(16)–O(54) | 1.828(8) |
| Mo(4)–O(34) | 2.148(9)  | Mo(16)–O(45) | 2.039(9) |
| Mo(4)–O(55) | 2.375(8)  | Mo(16)–O(44) | 2.074(8) |
| Mo(5)–O(5)  | 1.680(9)  | Mo(16)–O(62) | 2.365(8) |
| Mo(5)–O(35) | 1.776(9)  | Mo(17)–O(17) | 1.674(9) |
| Mo(5)–O(30) | 1.868(9)  | Mo(17)–O(47) | 1.775(8) |
| Mo(5)–O(29) | 1.930(9)  | Mo(17)–O(45) | 1.839(8) |
| Mo(5)–O(26) | 2.139(9)  | Mo(17)–O(52) | 2.033(8) |
| Mo(5)–O(55) | 2.285(8)  | Mo(17)–O(46) | 2.056(8) |
| Mo(6)–O(6)  | 1.694(9)  | Mo(17)–O(62) | 2.395(8) |
| Mo(6)–O(27) | 1.797(9)  | Mo(18)–O(18) | 1.681(9) |
| Mo(6)–O(31) | 1.875(9)  | Mo(18)–O(53) | 1.760(8) |

---

|                   |          |                    |           |
|-------------------|----------|--------------------|-----------|
| Mo(6)–O(30)       | 1.909(8) | Mo(18)–O(52)       | 1.828(8)  |
| Mo(6)–O(36)       | 2.109(9) | Mo(18)–O(51)       | 2.036(9)  |
| Mo(6)–O(56)       | 2.343(8) | Mo(18)–O(54)       | 2.063(9)  |
| Mo(7)–O(7)        | 1.692(8) | Mo(18)–O(62)       | 2.408(8)  |
| Mo(7)–O(37)       | 1.776(8) | Ag(1)–O(69)        | 2.250(15) |
| Mo(7)–O(32)       | 1.862(8) | Ag(1)–O(70)        | 2.271(14) |
| Mo(7)–O(31)       | 1.948(8) | Ag(1)–Ag(2)        | 3.286(3)  |
| Mo(7)–O(25)       | 2.138(8) | Ag(1)–O(11A)       | 2.520(9)  |
| Mo(7)–O(56)       | 2.301(8) | Ag(1)–O(16)        | 2.288(8)  |
| Mo(8)–O(8)        | 1.677(8) | Ag(2)–N(1)         | 2.157(13) |
| Mo(8)–O(24)       | 1.787(8) | Ag(2)–N(4)         | 2.198(10) |
| Mo(8)–O(33)       | 1.869(9) | Ag(2)–O(63)        | 2.709(14) |
| Mo(8)–O(32)       | 1.925(9) | Ag(3)–O(71)        | 2.252(10) |
| Mo(8)–O(38)       | 2.126(8) | Ag(3)–N(3)         | 2.270(11) |
| Mo(8)–O(57)       | 2.349(8) | Ag(3)–O(40)        | 2.575(8)  |
| Mo(9)–O(9)        | 1.689(9) | Ag(3)–O(65)        | 2.697(11) |
| Mo(9)–O(39)       | 1.780(8) | Ag(4)–N(5)         | 2.245(12) |
| Mo(9)–O(28)       | 1.871(9) | Ag(4)–O(72)        | 2.412(10) |
| Mo(9)–O(33)       | 1.952(8) | Ag(4)–O(6)         | 2.539(9)  |
| Mo(9)–O(19)       | 2.115(8) | Ag(4)–O(7B)        | 2.367(8)  |
| Mo(9)–O(57)       | 2.334(9) | Ag(5)–O(73)        | 2.24(3)   |
| Mo(10)–O(10)      | 1.686(9) | Ag(5)–O(68)        | 2.629(10) |
| Mo(10)–O(51)      | 1.797(9) | Ag(5)–N(6)         | 2.339(11) |
| Mo(10)–O(50)      | 1.884(8) | Ag(5)–O(15C)       | 2.437(9)  |
| Mo(10)–O(43)      | 1.911(8) | Ag(5)–O(72C)       | 2.350(10) |
| Mo(10)–O(35)      | 2.105(9) | Ag(6)–O(74)        | 2.16(3)   |
| Mo(10)–O(59)      | 2.364(8) | Ag(6)–O(75)        | 2.32(2)   |
| Mo(11)–O(11)      | 1.683(9) | Ag(6)–O(5)         | 2.523(10) |
| Mo(11)–O(34)      | 1.749(9) | Ag(6)–O(4W)        | 2.61(6)   |
| Mo(11)–O(49)      | 1.879(8) |                    |           |
| O(55)–P(1)–O(57)  | 111.4(5) | O(71)–Ag(3)–N(3)   | 137.3(4)  |
| O(55)–P(1)–O(56)  | 111.2(5) | O(71)–Ag(3)–O(40)  | 110.5(3)  |
| O(57)–P(1)–O(56)  | 110.4(5) | N(3)–Ag(3)–O(40)   | 97.6(3)   |
| O(55)–P(1)–O(58)  | 108.0(5) | O(71)–Ag(3)–O(65)  | 78.9(4)   |
| O(57)–P(1)–O(58)  | 108.1(5) | N(3)–Ag(3)–O(65)   | 66.8(4)   |
| O(56)–P(1)–O(58)  | 107.5(5) | O(40)–Ag(3)–O(65)  | 95.0(3)   |
| O(60)–P(2)–O(61)  | 111.4(4) | N(5)–Ag(4)–O(7B)   | 139.9(4)  |
| O(60)–P(2)–O(59)  | 110.7(5) | N(5)–Ag(4)–O(72)   | 131.8(4)  |
| O(61)–P(2)–O(59)  | 109.9(5) | O(7B)–Ag(4)–O(72)  | 87.2(3)   |
| O(60)–P(2)–O(62)  | 107.3(4) | N(5)–Ag(4)–O(6)    | 106.5(4)  |
| O(61)–P(2)–O(62)  | 109.3(5) | O(7B)–Ag(4)–O(6)   | 88.7(3)   |
| O(59)–P(2)–O(62)  | 108.2(4) | O(72)–Ag(4)–O(6)   | 77.3(3)   |
| O(69)–Ag(1)–O(70) | 102.0(6) | O(73)–Ag(5)–N(6)   | 101.2(10) |
| O(69)–Ag(1)–O(16) | 128.3(4) | O(73)–Ag(5)–O(72C) | 128.9(10) |

---

---

|                    |          |                     |           |
|--------------------|----------|---------------------|-----------|
| O(70)–Ag(1)–O(16)  | 116.7(4) | N(6)–Ag(5)–O(72C)   | 126.9(4)  |
| O(69)–Ag(1)–O(11A) | 92.2(4)  | O(73)–Ag(5)–O(15C)  | 84.0(10)  |
| O(70)–Ag(1)–O(11A) | 83.7(4)  | N(6)–Ag(5)–O(15C)   | 113.4(4)  |
| O(16)–Ag(1)–O(11A) | 123.4(3) | O(72C)–Ag(5)–O(15C) | 90.7(3)   |
| O(69)–Ag(1)–Ag(2)  | 74.6(4)  | O(73)–Ag(5)–O(68)   | 116.9(10) |
| O(70)–Ag(1)–Ag(2)  | 112.9(4) | N(6)–Ag(5)–O(68)    | 67.2(3)   |
| O(16)–Ag(1)–Ag(2)  | 59.9(2)  | O(72C)–Ag(5)–O(68)  | 74.4(4)   |
| O(11A)–Ag(1)–Ag(2) | 160.4(2) | O(15C)–Ag(5)–O(68)  | 158.9(4)  |
| N(1)–Ag(2)–N(4)    | 155.9(5) | O(74)–Ag(6)–O(75)   | 146.1(10) |
| N(1)–Ag(2)–Ag(1)   | 85.0(4)  | O(74)–Ag(6)–O(5)    | 102.0(8)  |
| N(4)–Ag(2)–Ag(1)   | 118.9(3) | O(75)–Ag(6)–O(5)    | 108.7(6)  |
| N(1)–Ag(2)–O(63)   | 69.3(5)  | O(74)–Ag(6)–O(4W)   | 100.1(17) |
| N(4)–Ag(2)–O(63)   | 104.3(4) | O(75)–Ag(6)–O(4W)   | 94.2(16)  |
| O(63)–Ag(2)–Ag(1)  | 106.7(2) | O(5)–Ag(6)–O(4W)    | 89.5(14)  |

---

Symmetry transformations used to generate equivalent atoms: A  $2 - x, -y, 1 - z$ ; B  $1 - x, -y, 2 - z$ ; C  $2 - x, -y, 2 - z$ .

**Table S2.** Hydrogen Bonding Interactions ( $\text{\AA}$  and  $^\circ$ ) of **1**.

| D–H...A              | D–H  | H...A | D...A     | $\angle$ DHA | Symmetry Codes          |
|----------------------|------|-------|-----------|--------------|-------------------------|
| C(1)–H(1A)...O(33)   | 0.93 | 2.36  | 3.24(2)   | 159          | $1 - x, - y, 1 - z$     |
| C(3)–H(3A)...O(52)   | 0.93 | 2.55  | 3.41(2)   | 154          | $2 - x, - 1 - y, 1 - z$ |
| C(5)–H(5A)...O(17)   | 0.93 | 2.55  | 3.34(2)   | 143          | $2 - x, - 1 - y, 1 - z$ |
| C(8)–H(8A)...O(54)   | 0.93 | 2.40  | 3.30(2)   | 161          |                         |
| C(9)–H(9A)...O(1)    | 0.93 | 2.50  | 3.26(2)   | 139          | $1 + x, - 1 + y, z$     |
| C(10)–H(10A)...O(9)  | 0.93 | 2.43  | 3.23(2)   | 144          | $1 + x, - 1 + y, z$     |
| C(12)–H(12A)...O(4)  | 0.93 | 2.59  | 3.46(2)   | 156          | $x, - 1 + y, z$         |
| C(18)–H(18A)...O(40) | 0.93 | 2.52  | 3.421(19) | 162          | $1 - x, - y, 1 - z$     |
| C(20)–H(20A)...O(69) | 0.93 | 2.48  | 3.01(2)   | 116          |                         |
| C(20)–H(20A)...O(50) | 0.93 | 2.59  | 3.40(2)   | 145          | $2 - x, - y, 1 - z$     |
| C(21)–H(21A)...O(41) | 0.93 | 2.57  | 3.47(2)   | 162          | $1 - x, - y, 2 - z$     |
| C(25)–H(25A)...O(15) | 0.93 | 2.58  | 3.49(2)   | 165          | $2 - x, - y, 2 - z$     |
| C(26)–H(26A)...O(6)  | 0.93 | 2.54  | 3.43(2)   | 159          |                         |
| C(29)–H(29A)...O(8)  | 0.93 | 2.50  | 3.20(2)   | 132          | $1 + x, y, z$           |
| C(29)–H(29A)...O(10) | 0.93 | 2.32  | 3.01(2)   | 130          |                         |
| C(32)–H(32B)...O(29) | 0.97 | 2.45  | 3.09(3)   | 124          | $2 - x, - y, 1 - z$     |
| C(33)–H(33A)...O(69) | 0.96 | 2.33  | 2.74(3)   | 105          |                         |
| C(33)–H(33C)...O(5)  | 0.96 | 2.38  | 3.32(3)   | 165          | $2 - x, - y, 1 - z$     |
| C(34)–H(34A)...O(11) | 0.93 | 2.46  | 3.13(3)   | 129          | $2 - x, - y, 1 - z$     |
| C(36)–H(36A)...O(70) | 0.96 | 2.27  | 2.72(3)   | 107          |                         |
| C(37)–H(37A)...O(12) | 0.93 | 2.59  | 3.24(2)   | 127          | $1 - x, - y, 1 - z$     |
| C(38)–H(38A)...O(71) | 0.96 | 2.36  | 2.77(3)   | 105          |                         |
| C(38)–H(38B)...O(54) | 0.96 | 2.57  | 3.27(3)   | 131          | $- 1 + x, y, z$         |
| C(40)–H(40A)...O(7)  | 0.93 | 2.55  | 3.161(16) | 124          | $1 - x, - y, 2 - z$     |
| C(41)–H(41A)...O(72) | 0.96 | 2.44  | 2.84(2)   | 104          |                         |
| C(49)–H(49A)...O(21) | 0.93 | 2.48  | 3.40(3)   | 171          |                         |
| C(50)–H(50A)...O(75) | 0.96 | 2.45  | 2.82(4)   | 102          |                         |
| C(51)–H(51A)...O(1)  | 0.96 | 2.58  | 3.41(3)   | 145          |                         |

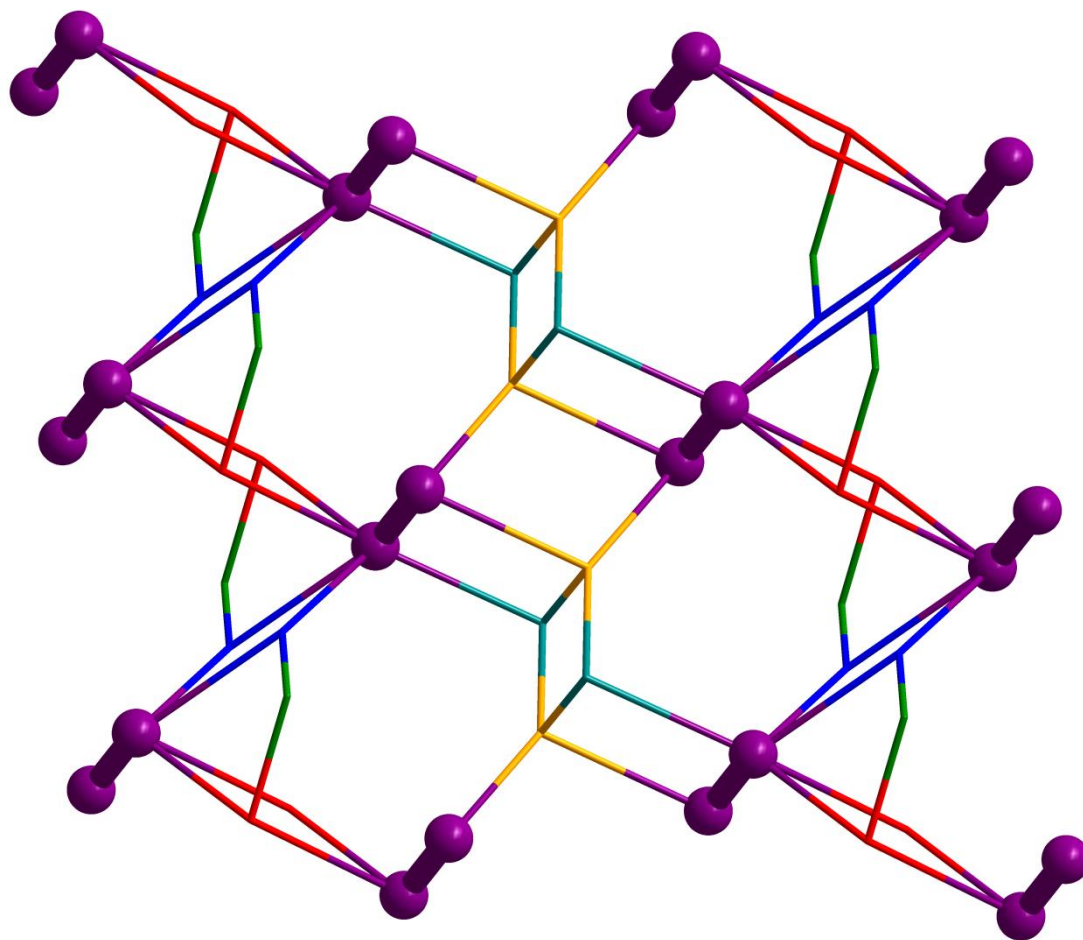

**Figure S1.** The 2D topologic structure with dumbbells diagram indicating  $[P_2Mo_{18}O_{62}]^{6-}$ .

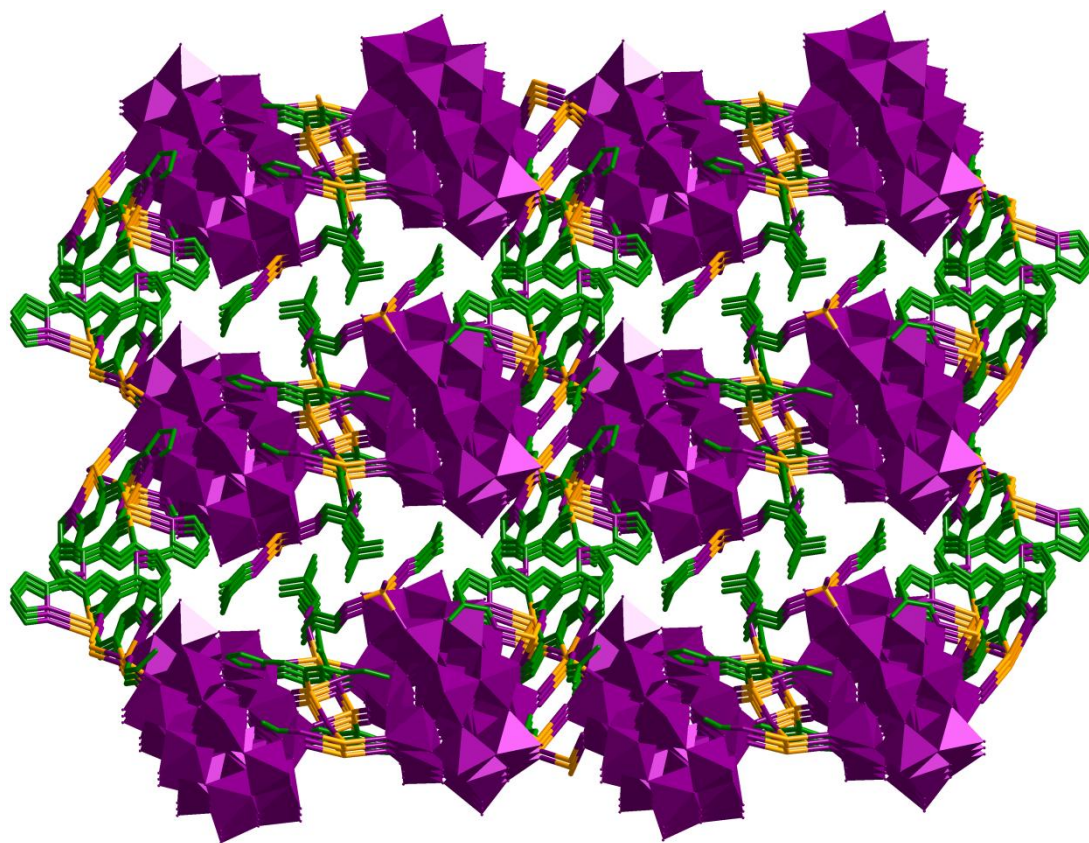

**Figure S2.** View of 3D structure of **1**.



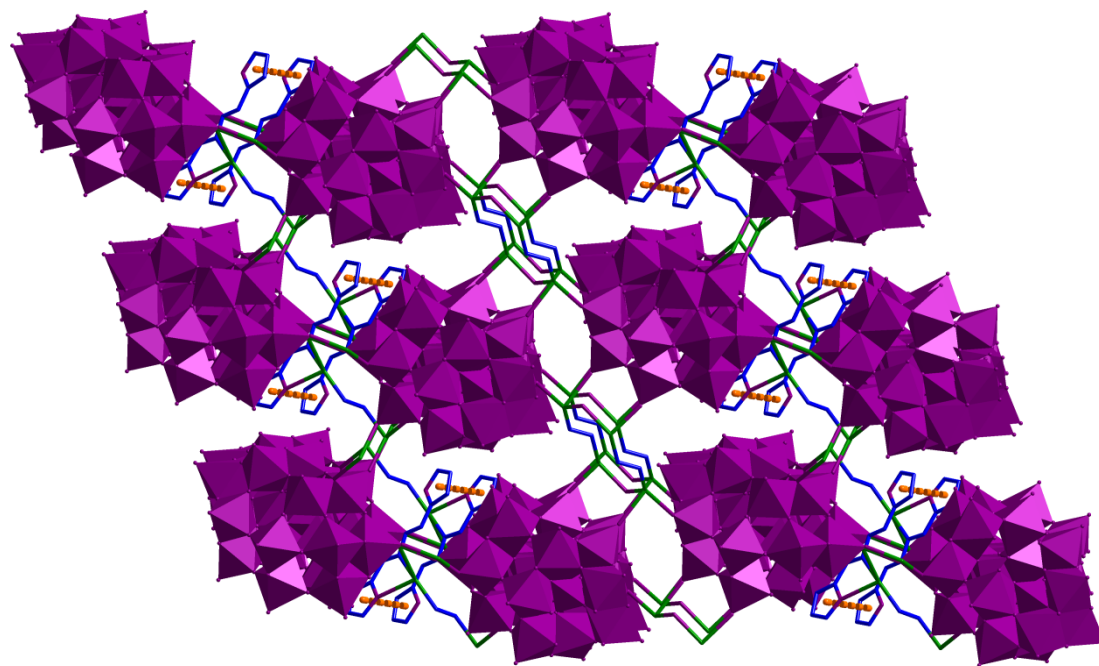

**Figure S3.** The 3D supramolecular framework of **1** showing  $\pi \cdots \pi$  interactions in dashed lines.



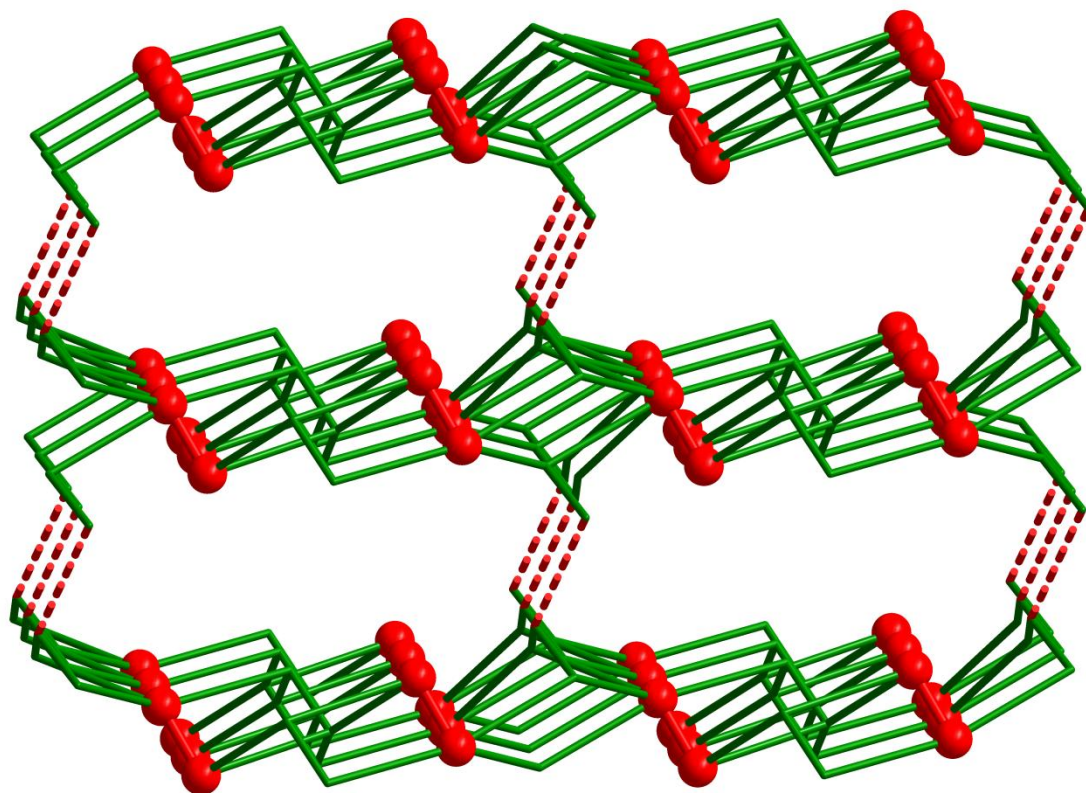

**Figure S4.** The 3D topologic structure of **1** showing  $\pi \cdots \pi$  interactions in dashed lines.

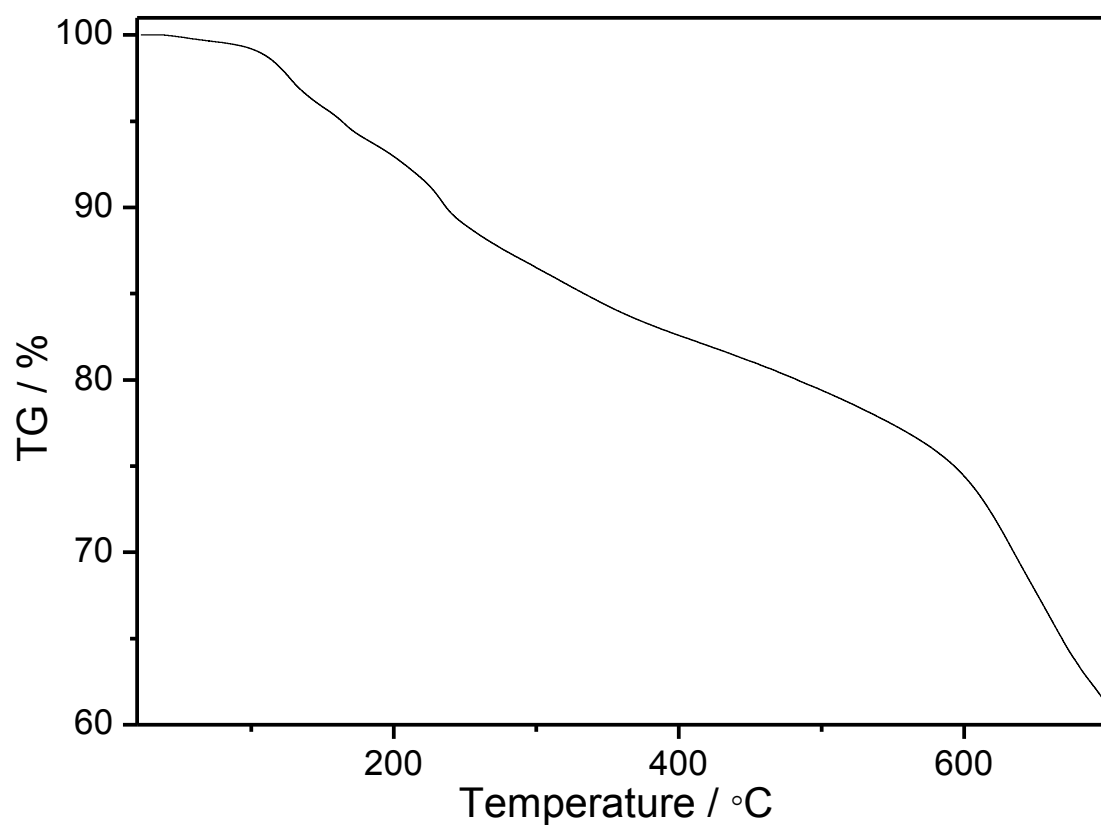

**Figure S5.** TGA curve for **1**.

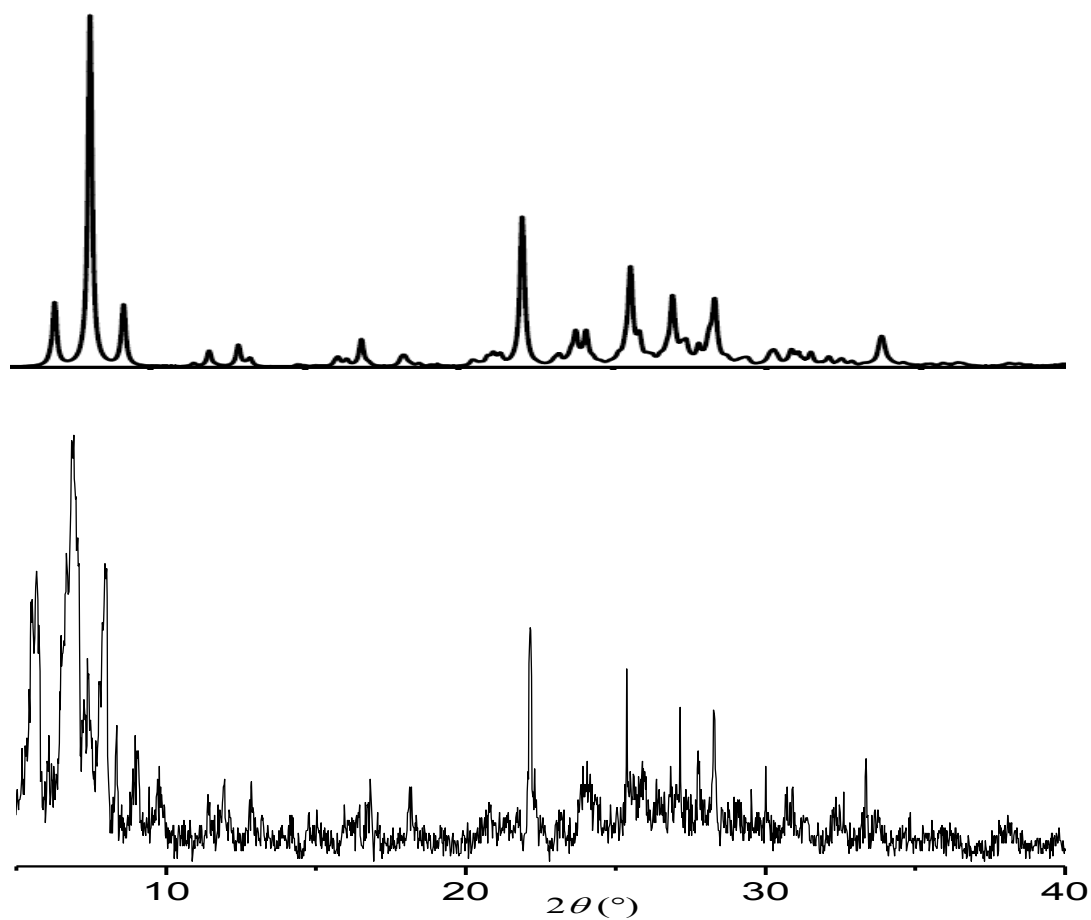

**Figure S6.** The pattern calculated from the single-crystal data for polymer **1** (top) and the power X-ray diffraction pattern of the samples at 296 K (bottom).

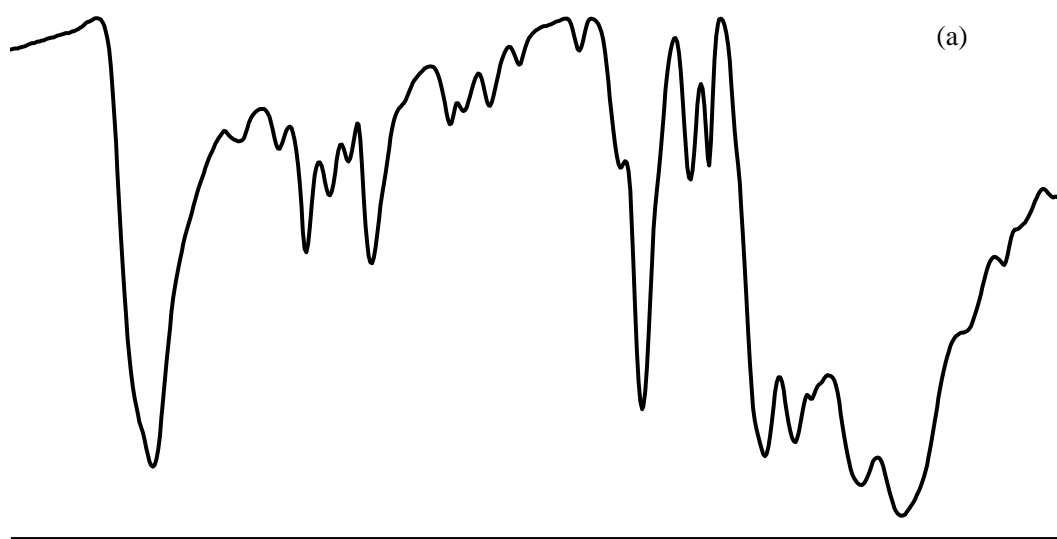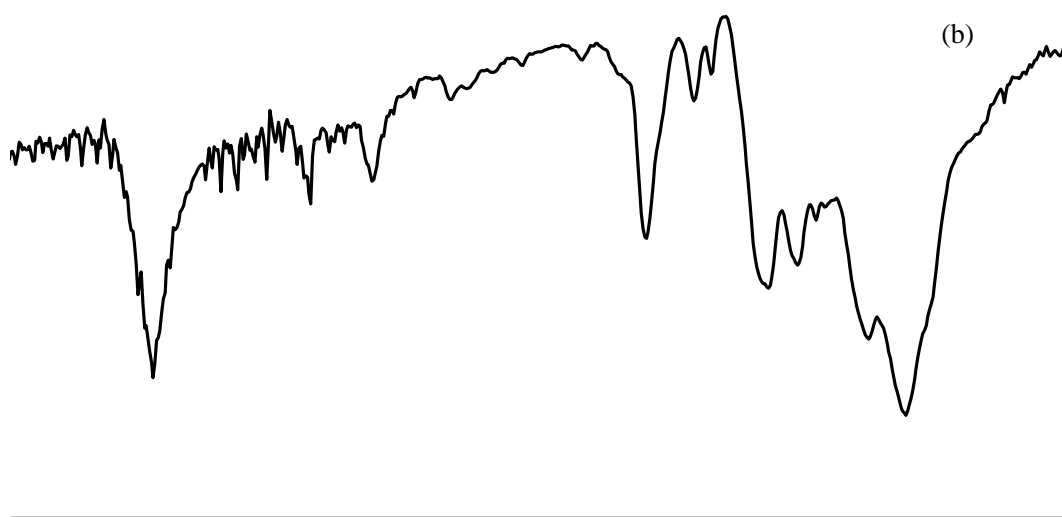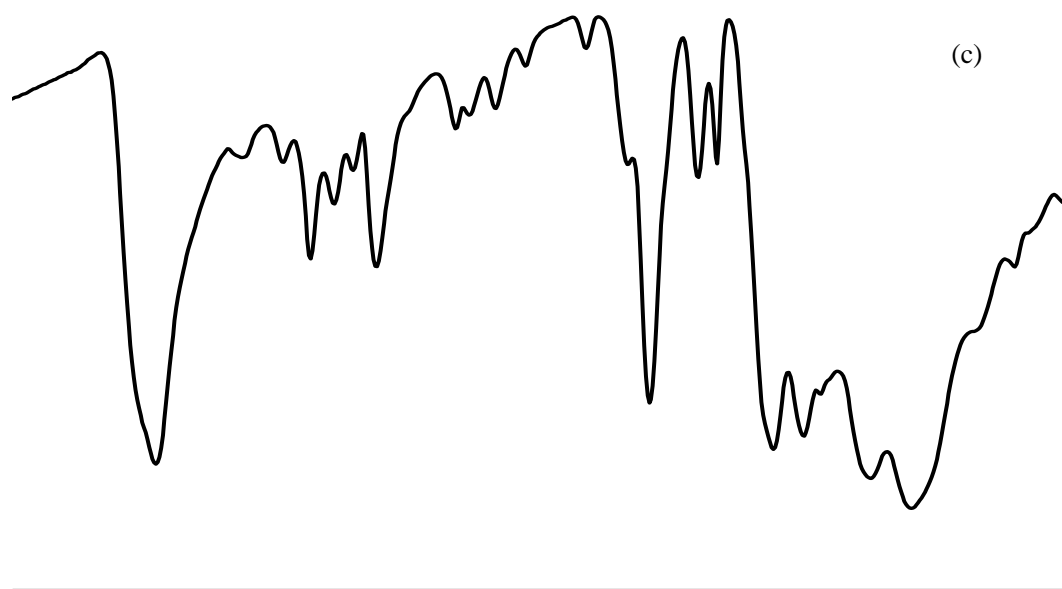

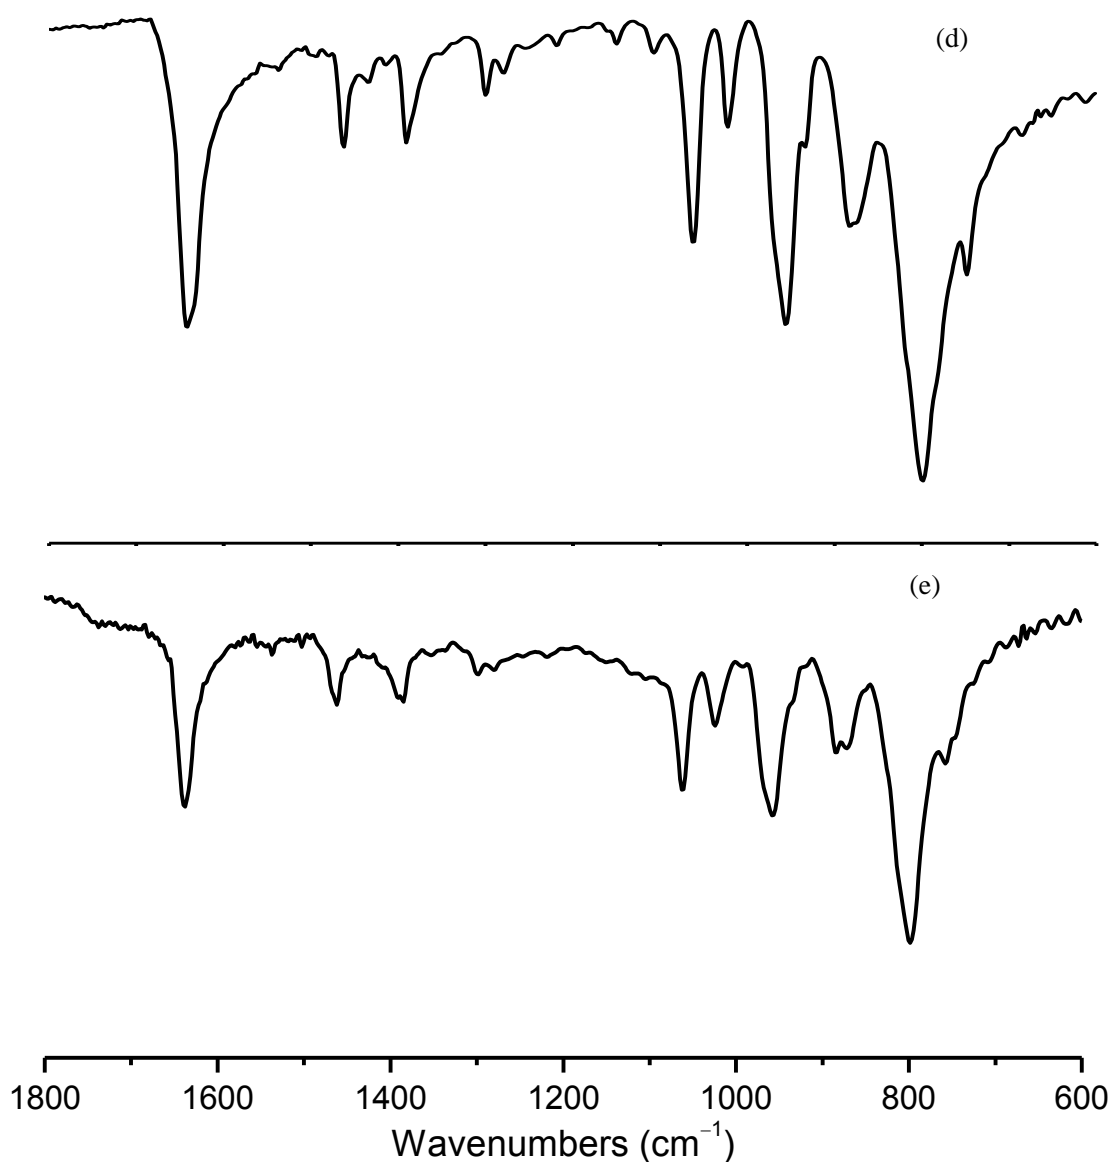

**Figure S7.** The IR spectra of (a)–(e) represent the solid products obtained under different pH values in DMF/CH<sub>3</sub>OH solution system, 2.8, 3.4, 3.8, 1.8 and 2.2, respectively.

Products under 2.8 (*a*) is the crystals of polymer **1** (Dawson-based compounds), besides, the bands of (*b*) and (*c*) exhibit the characteristic bands of Dawson anion [P<sub>2</sub>Mo<sub>18</sub>O<sub>62</sub>]<sup>6-</sup>, which agrees well with Dawson-based compounds.

The IR spectra of (*d*) and (*e*) show the characteristic bands of Keggin anion [PMo<sub>12</sub>O<sub>40</sub>]<sup>3-</sup>, which can be assigned to Keggin-based compounds.

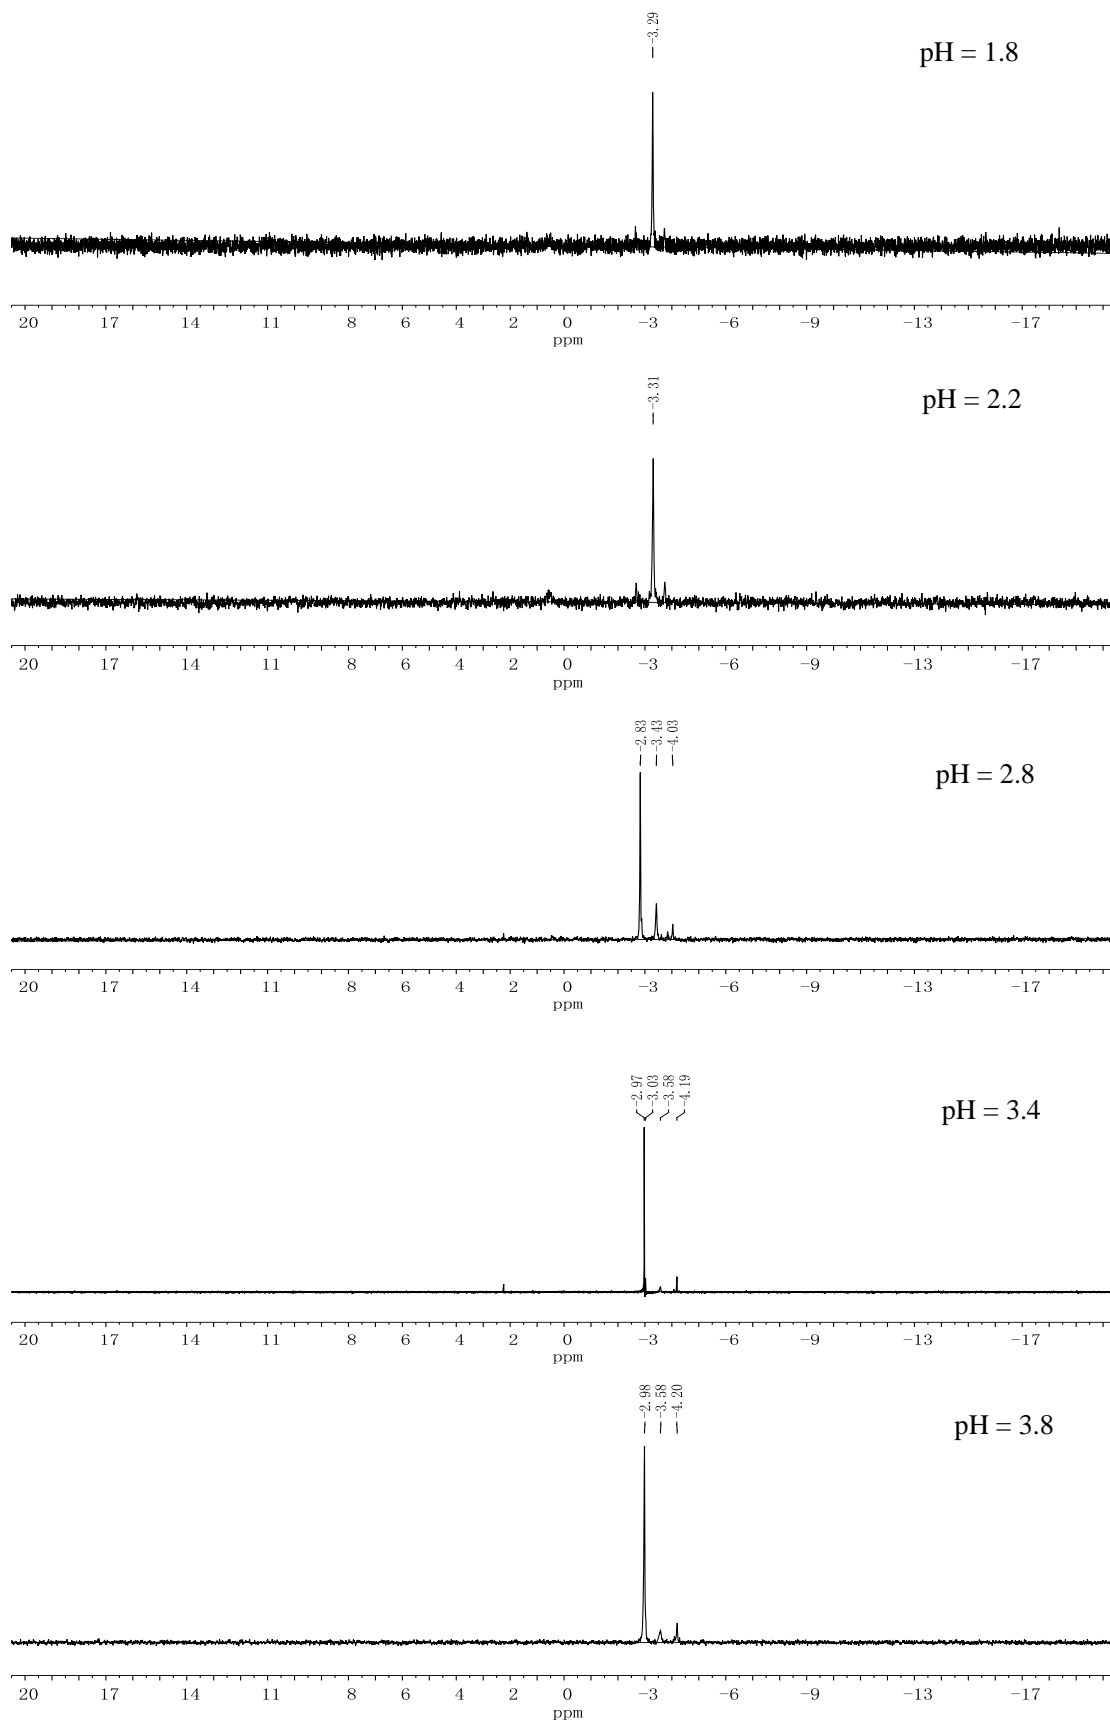

**Figure S8.**  $^{31}\text{P}$  NMR spectra for  $\text{H}_3\text{PMo}_{12}\text{O}_{40}$  alone in DMF solution at different pH values.

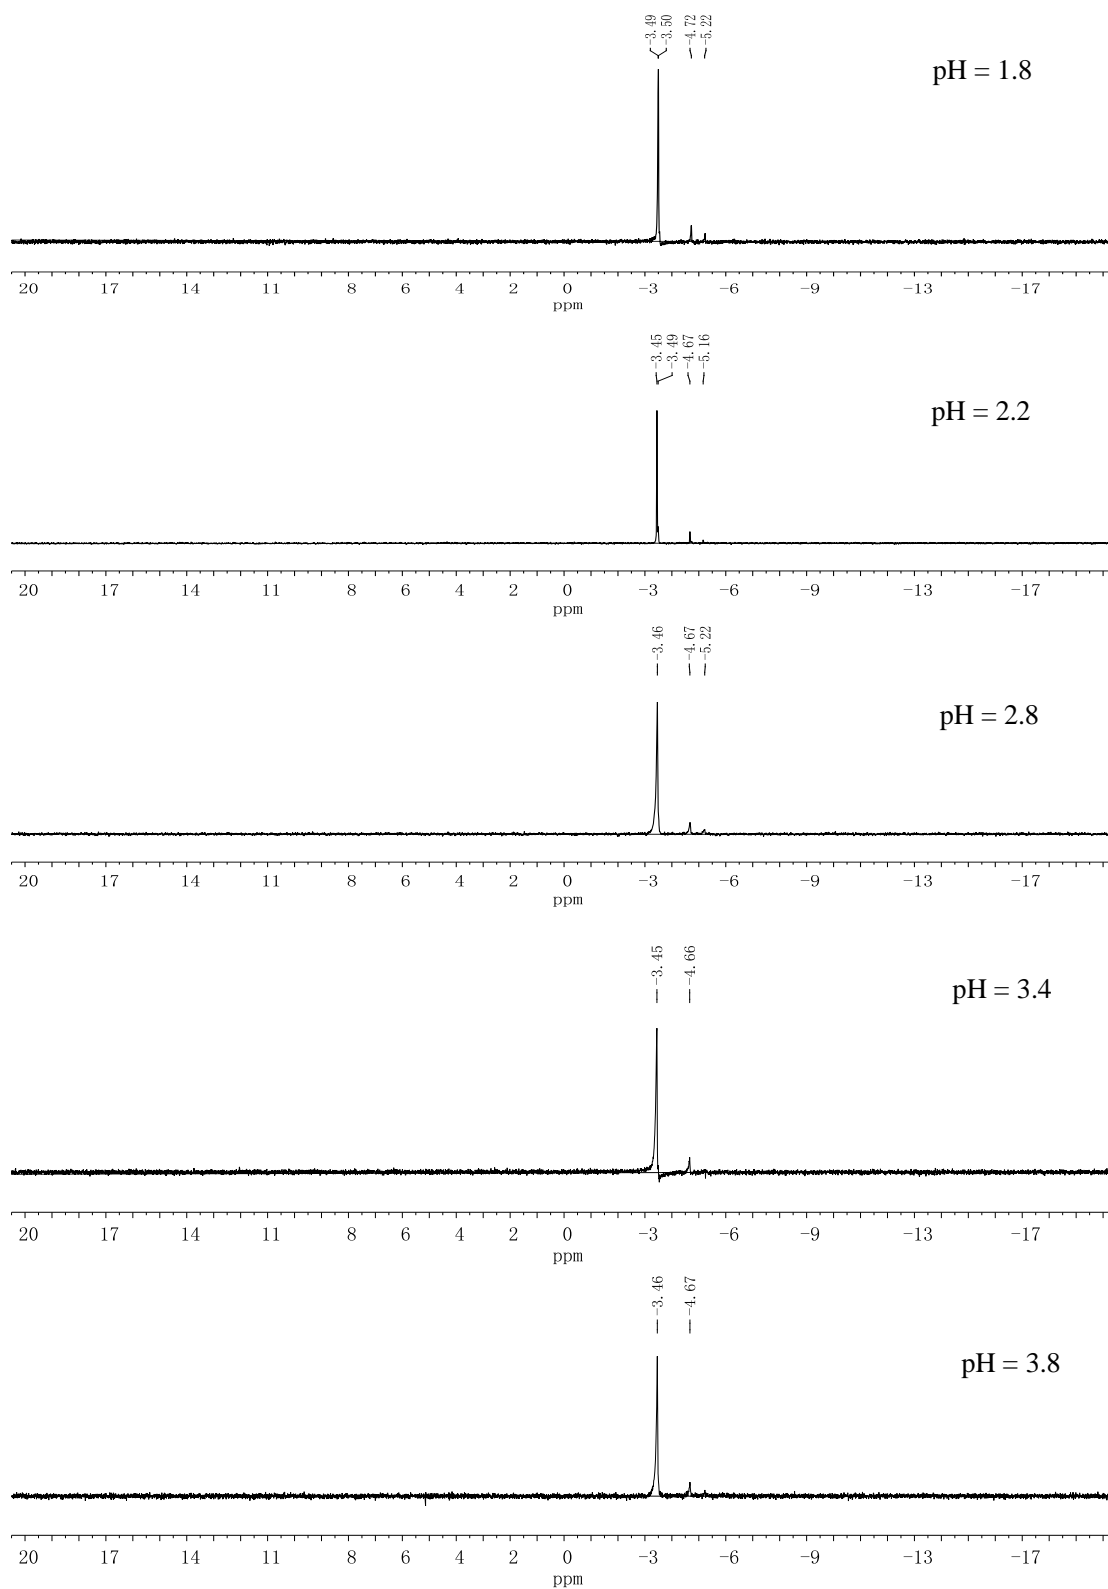

**Figure S9.**  $^{31}\text{P}$  NMR spectra for  $\text{H}_6\text{P}_2\text{Mo}_{18}\text{O}_{62}$  alone in DMF solution at different pH values.



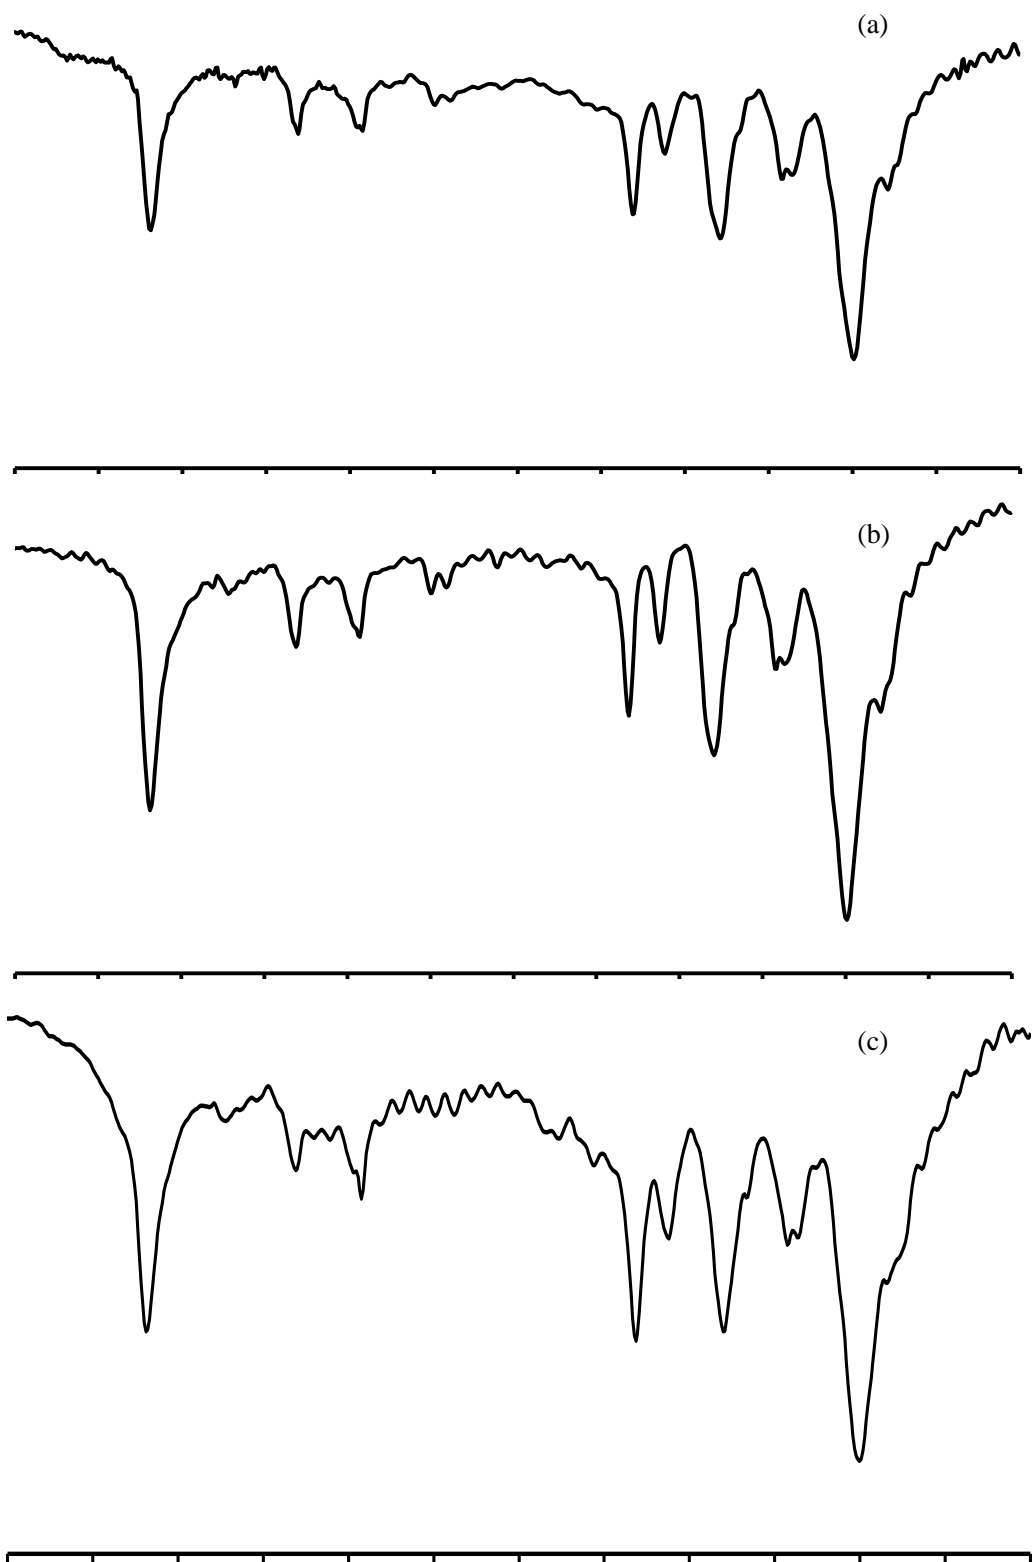

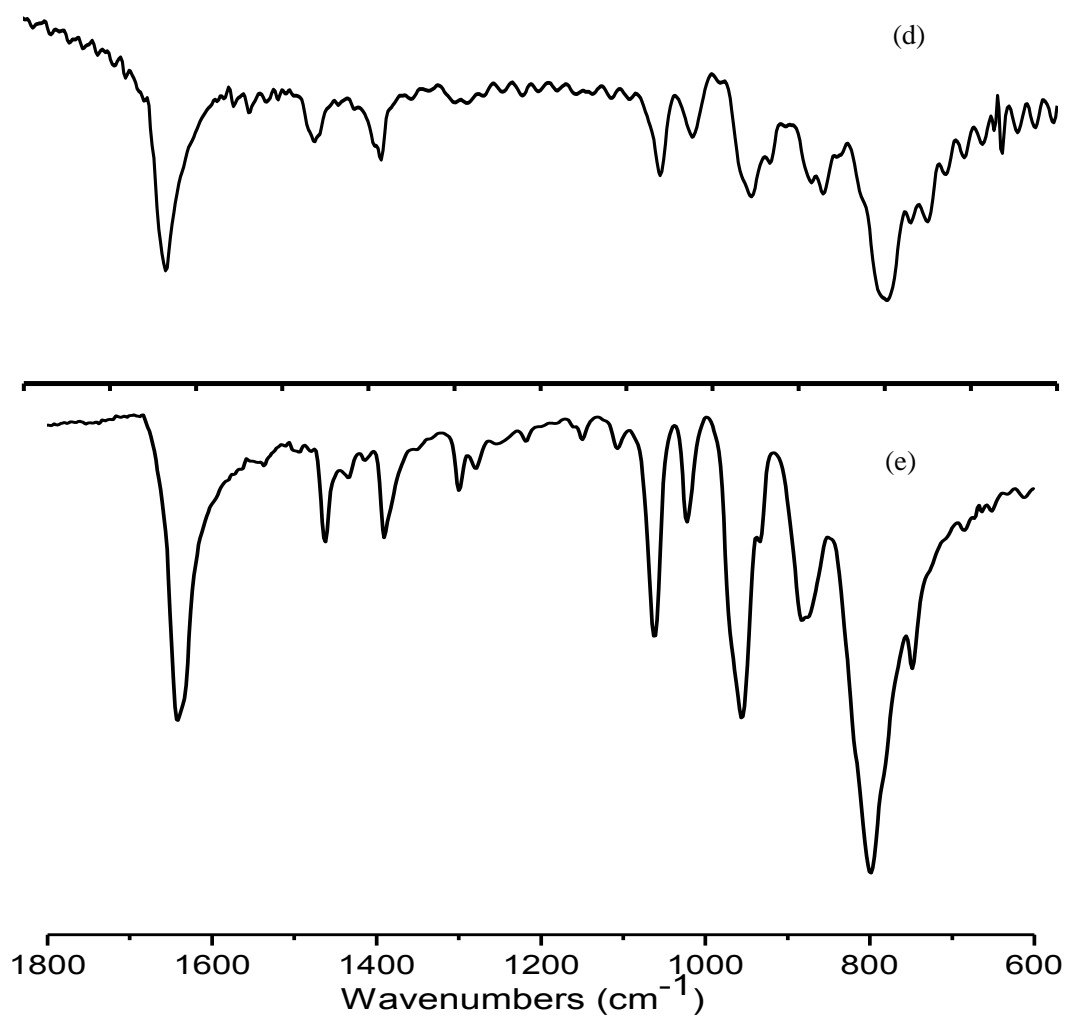

**Figure S10.** The IR spectra of (a)–(e) represent the solid products obtained under different pH values in H<sub>2</sub>O/CH<sub>3</sub>OH solution system, 1.8, 2.2, 2.8, 3.4 and 3.8, respectively. All the IR spectra show the characteristic bands of Keggin anion [PMo<sub>12</sub>O<sub>40</sub>]<sup>3-</sup>, which can be assigned to Keggin-based compounds.
